# Supplementary material for: Improved Predictions of the Geographic Distribution of Invasive Plants Using Climatic Niche Models
Source: PubMed Central journal article supplement (PMC4873032; doi:10.1371/journal.pone.0156029), 2016-05-19
Supplement: pone.0156029.s001.pdf [file pone.0156029.s001.pdf]

## S1 Datasets

Occurrence records of Peruvian peppertrees in Mexico (geographic coordinates). The datasets below include adult individuals naturally established in the field (Dataset 1), juvenile (non-reproductive) individuals naturally established in the field (Dataset 2), and human-subsidized occurrences in human settlements and field sites where man-planted peppertrees were found (Dataset 3).

**Dataset 1.** Occurrence records of naturally established adult peppertrees (individuals over 2.0 m tall with flowers and/or fruits) taken in field sites from Mexico.

| <b>Occurrence record</b> | <b>Latitude</b> | <b>Longitude</b> |
|--------------------------|-----------------|------------------|
| Occurrence 001           | 21.9796         | -101.2886        |
| Occurrence 002           | 21.8731         | -101.6726        |
| Occurrence 003           | 21.8001         | -102.0365        |
| Occurrence 004           | 21.9101         | -101.8622        |
| Occurrence 005           | 21.9652         | -101.9186        |
| Occurrence 006           | 21.7596         | -101.8473        |
| Occurrence 007           | 21.9024         | -101.1897        |
| Occurrence 008           | 22.3319         | -101.2017        |
| Occurrence 009           | 22.4444         | -101.4911        |
| Occurrence 010           | 23.6217         | -101.7567        |
| Occurrence 011           | 22.6719         | -102.0580        |
| Occurrence 012           | 22.7678         | -102.4644        |
| Occurrence 013           | 23.0298         | -102.7611        |
| Occurrence 014           | 21.2894         | -102.2542        |
| Occurrence 015           | 20.5955         | -100.2505        |
| Occurrence 016           | 20.3042         | -99.9343         |
| Occurrence 017           | 21.8485         | -100.7447        |
| Occurrence 018           | 21.4672         | -100.7172        |
| Occurrence 019           | 21.0334         | -100.4614        |
| Occurrence 020           | 18.9870         | -97.9135         |
| Occurrence 021           | 18.6574         | -97.6327         |
| Occurrence 022           | 18.2718         | -97.1137         |
| Occurrence 023           | 25.3641         | -100.7992        |
| Occurrence 024           | 22.8455         | -99.8554         |
| Occurrence 025           | 22.1024         | -100.6997        |
| Occurrence 026           | 22.0253         | -100.2641        |
| Occurrence 027           | 21.8736         | -100.8960        |
| Occurrence 028           | 21.7229         | -100.9662        |
| Occurrence 029           | 21.5778         | -101.0984        |
| Occurrence 030           | 21.4384         | -101.2216        |
| Occurrence 031           | 21.2552         | -101.2931        |
| Occurrence 032           | 21.3140         | -101.9278        |

**Dataset 1** (continued).

| <b>Occurrence record</b> | <b>Latitude</b> | <b>Longitude</b> |
|--------------------------|-----------------|------------------|
| Occurrence 033           | 21.4587         | -101.7972        |
| Occurrence 034           | 21.5758         | -101.6630        |
| Occurrence 035           | 21.7473         | -101.6076        |
| Occurrence 036           | 22.0846         | -101.1644        |
| Occurrence 037           | 22.6760         | -102.0805        |
| Occurrence 038           | 22.7336         | -102.6780        |
| Occurrence 039           | 22.6208         | -102.8000        |
| Occurrence 040           | 22.6854         | -103.0207        |
| Occurrence 041           | 22.1738         | -102.4571        |
| Occurrence 042           | 22.1929         | -102.2947        |
| Occurrence 043           | 22.3138         | -102.2363        |
| Occurrence 044           | 22.2232         | -102.0014        |
| Occurrence 045           | 22.0554         | -102.0990        |
| Occurrence 046           | 21.9608         | -102.1591        |
| Occurrence 047           | 18.3684         | -97.2801         |
| Occurrence 048           | 21.8523         | -100.9138        |
| Occurrence 049           | 21.3511         | -101.1364        |
| Occurrence 050           | 21.2444         | -101.0720        |
| Occurrence 051           | 21.1797         | -101.9089        |
| Occurrence 052           | 21.9558         | -101.7623        |
| Occurrence 053           | 20.6540         | -100.7661        |
| Occurrence 054           | 20.5697         | -100.8889        |
| Occurrence 055           | 20.5895         | -101.0978        |
| Occurrence 056           | 20.4689         | -101.1314        |
| Occurrence 057           | 20.0821         | -101.1371        |
| Occurrence 058           | 19.9035         | -101.1360        |
| Occurrence 059           | 19.9063         | -100.5691        |
| Occurrence 060           | 19.8868         | -100.3267        |
| Occurrence 061           | 19.6927         | -98.8143         |
| Occurrence 062           | 19.8266         | -98.7062         |
| Occurrence 063           | 19.9324         | -98.5648         |
| Occurrence 064           | 20.0673         | -98.4310         |
| Occurrence 065           | 21.1476         | -100.5641        |
| Occurrence 066           | 20.8716         | -100.4217        |
| Occurrence 067           | 20.1891         | -99.7728         |
| Occurrence 068           | 21.8318         | -100.7305        |
| Occurrence 069           | 21.6400         | -100.7211        |
| Occurrence 070           | 21.3784         | -100.6797        |
| Occurrence 071           | 20.4577         | -100.0923        |
| Occurrence 072           | 18.9876         | -97.8433         |
| Occurrence 073           | 18.8902         | -97.6008         |
| Occurrence 074           | 18.8454         | -97.4375         |
| Occurrence 075           | 17.2210         | -96.8676         |
| Occurrence 076           | 18.2739         | -97.1287         |
| Occurrence 077           | 18.4257         | -97.3485         |

**Dataset 1** (continued).

| <b>Occurrence record</b> | <b>Latitude</b> | <b>Longitude</b> |
|--------------------------|-----------------|------------------|
| Occurrence 078           | 18.5654         | -97.4638         |
| Occurrence 079           | 18.7657         | -97.4836         |
| Occurrence 080           | 18.8965         | -97.6106         |
| Occurrence 081           | 19.2023         | -98.3408         |
| Occurrence 082           | 19.3520         | -98.4056         |
| Occurrence 083           | 19.6393         | -98.5633         |
| Occurrence 084           | 19.7934         | -98.6562         |
| Occurrence 085           | 19.9083         | -98.8022         |
| Occurrence 086           | 20.1096         | -98.3323         |
| Occurrence 087           | 19.7610         | -98.5007         |
| Occurrence 088           | 19.8329         | -98.6112         |
| Occurrence 089           | 19.9803         | -98.7020         |
| Occurrence 090           | 20.1568         | -98.9018         |
| Occurrence 091           | 20.2963         | -98.9835         |
| Occurrence 092           | 20.3950         | -98.0898         |
| Occurrence 093           | 20.4846         | -98.3143         |
| Occurrence 094           | 20.4326         | -99.5501         |
| Occurrence 095           | 20.3208         | -99.7108         |
| Occurrence 096           | 20.3040         | -99.8929         |
| Occurrence 097           | 19.5578         | -98.7521         |

**Dataset 2.** Occurrence records of naturally established juvenile peppertrees (young non-reproductive individuals up to 2.0 m tall) taken in field sites from Mexico.

| <b>Occurrence record</b> | <b>Latitude</b> | <b>Longitude</b> |
|--------------------------|-----------------|------------------|
| Occurrence 001           | 21.9796         | -101.2886        |
| Occurrence 002           | 21.8731         | -101.6726        |
| Occurrence 003           | 21.9101         | -101.8622        |
| Occurrence 004           | 21.9652         | -101.9186        |
| Occurrence 005           | 21.7596         | -101.8473        |
| Occurrence 006           | 21.9024         | -101.1897        |
| Occurrence 007           | 22.3319         | -101.2017        |
| Occurrence 008           | 22.4444         | -101.4911        |
| Occurrence 009           | 23.6217         | -101.7567        |
| Occurrence 010           | 22.6719         | -102.0580        |
| Occurrence 011           | 22.7678         | -102.4644        |
| Occurrence 012           | 23.0298         | -102.7611        |
| Occurrence 013           | 20.3042         | -99.9343         |
| Occurrence 014           | 21.8485         | -100.7447        |
| Occurrence 015           | 21.4672         | -100.7172        |
| Occurrence 016           | 21.0334         | -100.4614        |
| Occurrence 017           | 18.2718         | -97.1137         |
| Occurrence 018           | 25.3641         | -100.7992        |
| Occurrence 019           | 22.1024         | -100.6997        |

**Dataset 2** (continued).

| <b>Occurrence record</b> | <b>Latitude</b> | <b>Longitude</b> |
|--------------------------|-----------------|------------------|
| Occurrence 020           | 22.0253         | -100.2641        |
| Occurrence 021           | 21.8736         | -100.8960        |
| Occurrence 022           | 21.7229         | -100.9662        |
| Occurrence 023           | 21.5778         | -101.0984        |
| Occurrence 024           | 21.4384         | -101.2216        |
| Occurrence 025           | 21.2552         | -101.2931        |
| Occurrence 026           | 21.3140         | -101.9278        |
| Occurrence 027           | 21.4587         | -101.7972        |
| Occurrence 028           | 21.5758         | -101.6630        |
| Occurrence 029           | 21.7473         | -101.6076        |
| Occurrence 030           | 22.0846         | -101.1644        |
| Occurrence 031           | 22.6760         | -102.0805        |
| Occurrence 032           | 22.7336         | -102.6780        |
| Occurrence 033           | 22.6208         | -102.8000        |
| Occurrence 034           | 22.6854         | -103.0207        |
| Occurrence 035           | 22.1738         | -102.4571        |
| Occurrence 036           | 22.1929         | -102.2947        |
| Occurrence 037           | 22.3138         | -102.2363        |
| Occurrence 038           | 22.2232         | -102.0014        |
| Occurrence 039           | 22.0554         | -102.0990        |
| Occurrence 040           | 21.9608         | -102.1591        |
| Occurrence 041           | 18.3684         | -97.2801         |
| Occurrence 042           | 21.8523         | -100.9138        |
| Occurrence 043           | 21.3511         | -101.1364        |
| Occurrence 044           | 21.2444         | -101.0720        |
| Occurrence 045           | 21.1797         | -101.9089        |
| Occurrence 046           | 20.6540         | -100.7661        |
| Occurrence 047           | 20.5697         | -100.8889        |
| Occurrence 048           | 20.5895         | -101.0978        |
| Occurrence 049           | 20.4689         | -101.1314        |
| Occurrence 050           | 19.9035         | -101.1360        |
| Occurrence 051           | 19.6927         | -98.8143         |
| Occurrence 052           | 19.8266         | -98.7062         |
| Occurrence 053           | 20.0673         | -98.4310         |
| Occurrence 054           | 21.1476         | -100.5641        |
| Occurrence 055           | 20.8716         | -100.4217        |
| Occurrence 056           | 20.1891         | -99.7728         |
| Occurrence 057           | 21.8318         | -100.7305        |
| Occurrence 058           | 21.6400         | -100.7211        |
| Occurrence 059           | 21.3784         | -100.6797        |
| Occurrence 060           | 20.4577         | -100.0923        |
| Occurrence 061           | 18.9876         | -97.8433         |
| Occurrence 062           | 18.8902         | -97.6008         |
| Occurrence 063           | 18.8454         | -97.4375         |

**Dataset 2** (continued).

| <b>Occurrence record</b> | <b>Latitude</b> | <b>Longitude</b> |
|--------------------------|-----------------|------------------|
| Occurrence 064           | 17.2210         | -96.8676         |
| Occurrence 065           | 18.2739         | -97.1287         |
| Occurrence 066           | 18.5654         | -97.4638         |
| Occurrence 067           | 18.7657         | -97.4836         |
| Occurrence 068           | 18.8965         | -97.6106         |
| Occurrence 069           | 19.2023         | -98.3408         |
| Occurrence 070           | 19.3520         | -98.4056         |
| Occurrence 071           | 19.6393         | -98.5633         |
| Occurrence 072           | 19.7934         | -98.6562         |
| Occurrence 073           | 19.9083         | -98.8022         |
| Occurrence 074           | 20.1096         | -98.3323         |
| Occurrence 075           | 19.7610         | -98.5007         |
| Occurrence 076           | 19.8329         | -98.6112         |
| Occurrence 077           | 19.9803         | -98.7020         |
| Occurrence 078           | 20.1568         | -98.9018         |
| Occurrence 079           | 20.2963         | -98.9835         |
| Occurrence 080           | 20.3950         | -98.0898         |
| Occurrence 081           | 20.4846         | -98.3143         |
| Occurrence 082           | 20.4326         | -99.5501         |
| Occurrence 083           | 20.3208         | -99.7108         |
| Occurrence 084           | 20.3040         | -99.8929         |

**Dataset 3.** Occurrence records of peppertrees taken in human settlements and field sites where man-planted individuals were found.

| <b>Occurrence record</b> | <b>Latitude</b> | <b>Longitude</b> |
|--------------------------|-----------------|------------------|
| Occurrence 001           | 14.9058         | -92.2632         |
| Occurrence 002           | 15.3688         | -92.2448         |
| Occurrence 003           | 16.2439         | -92.1242         |
| Occurrence 004           | 16.7574         | -93.3737         |
| Occurrence 005           | 16.8190         | -92.5061         |
| Occurrence 006           | 16.9227         | -96.3625         |
| Occurrence 007           | 16.9543         | -96.4739         |
| Occurrence 008           | 17.0305         | -96.5200         |
| Occurrence 009           | 17.0667         | -96.7895         |
| Occurrence 010           | 17.0812         | -96.6606         |
| Occurrence 011           | 17.2856         | -96.9024         |
| Occurrence 012           | 17.6728         | -97.5723         |
| Occurrence 013           | 18.1898         | -97.6791         |
| Occurrence 014           | 18.2603         | -97.1510         |
| Occurrence 018           | 18.3684         | -97.2801         |
| Occurrence 019           | 18.3763         | -97.2878         |
| Occurrence 020           | 18.4034         | -97.3297         |
| Occurrence 021           | 18.4257         | -97.3485         |

**Dataset 3** (continued).

| <b>Occurrence record</b> | <b>Latitude</b> | <b>Longitude</b> |
|--------------------------|-----------------|------------------|
| Occurrence 022           | 18.4444         | -97.3690         |
| Occurrence 023           | 18.4648         | -97.3865         |
| Occurrence 024           | 18.5563         | -99.6053         |
| Occurrence 025           | 18.5654         | -97.4638         |
| Occurrence 015           | 18.2938         | -97.2708         |
| Occurrence 016           | 18.3251         | -97.2406         |
| Occurrence 017           | 18.3455         | -99.5397         |
| Occurrence 026           | 18.6574         | -97.6327         |
| Occurrence 027           | 18.7157         | -97.3078         |
| Occurrence 028           | 18.7657         | -97.4836         |
| Occurrence 029           | 18.8141         | -98.9547         |
| Occurrence 030           | 18.8351         | -97.5463         |
| Occurrence 031           | 18.8784         | -99.1784         |
| Occurrence 032           | 18.8902         | -97.6008         |
| Occurrence 033           | 18.9134         | -97.8238         |
| Occurrence 034           | 18.9231         | -99.2265         |
| Occurrence 035           | 18.9348         | -99.2322         |
| Occurrence 036           | 18.9439         | -99.4943         |
| Occurrence 037           | 18.9560         | -97.6582         |
| Occurrence 038           | 18.9611         | -99.5903         |
| Occurrence 039           | 18.9788         | -97.7851         |
| Occurrence 040           | 19.0344         | -99.2052         |
| Occurrence 041           | 19.0402         | -98.0466         |
| Occurrence 042           | 19.0436         | -100.0420        |
| Occurrence 043           | 19.0527         | -97.9925         |
| Occurrence 044           | 19.0626         | -98.2774         |
| Occurrence 045           | 19.0829         | -98.3195         |
| Occurrence 046           | 19.1032         | -99.5903         |
| Occurrence 047           | 19.1065         | -97.9537         |
| Occurrence 048           | 19.1176         | -98.7680         |
| Occurrence 049           | 19.1216         | -97.0846         |
| Occurrence 050           | 19.1576         | -98.4085         |
| Occurrence 051           | 19.1617         | -99.6178         |
| Occurrence 052           | 19.1959         | -100.1327        |
| Occurrence 053           | 19.2023         | -98.3408         |
| Occurrence 054           | 19.2329         | -98.3144         |
| Occurrence 055           | 19.2512         | -103.7303        |
| Occurrence 056           | 19.2563         | -99.6048         |
| Occurrence 057           | 19.2572         | -98.4059         |
| Occurrence 058           | 19.2667         | -98.9000         |
| Occurrence 059           | 19.2724         | -98.8358         |
| Occurrence 060           | 19.2811         | -99.4806         |
| Occurrence 061           | 19.2814         | -98.9030         |
| Occurrence 062           | 19.3001         | -98.2401         |

**Dataset 3** (continued).

| <b>Occurrence record</b> | <b>Latitude</b> | <b>Longitude</b> |
|--------------------------|-----------------|------------------|
| Occurrence 063           | 19.3130         | -97.9240         |
| Occurrence 064           | 19.3297         | -98.2179         |
| Occurrence 065           | 19.3491         | -99.0542         |
| Occurrence 066           | 19.3520         | -98.4056         |
| Occurrence 067           | 19.3616         | -99.3502         |
| Occurrence 068           | 19.4004         | -99.6959         |
| Occurrence 069           | 19.4108         | -99.7296         |
| Occurrence 070           | 19.4203         | -99.1819         |
| Occurrence 071           | 19.4697         | -98.5566         |
| Occurrence 072           | 19.4706         | -98.3471         |
| Occurrence 073           | 19.4840         | -99.2424         |
| Occurrence 074           | 19.5126         | -98.8800         |
| Occurrence 075           | 19.5305         | -96.9091         |
| Occurrence 076           | 19.5406         | -98.5565         |
| Occurrence 077           | 19.5514         | -98.8104         |
| Occurrence 078           | 19.5629         | -97.2416         |
| Occurrence 079           | 19.5781         | -98.6769         |
| Occurrence 080           | 19.5904         | -98.6189         |
| Occurrence 081           | 19.6206         | -98.1239         |
| Occurrence 082           | 19.6393         | -98.5633         |
| Occurrence 083           | 19.6450         | -99.1694         |
| Occurrence 084           | 19.6850         | -98.8660         |
| Occurrence 085           | 19.6985         | -98.7537         |
| Occurrence 086           | 19.7015         | -101.1868        |
| Occurrence 087           | 19.7055         | -98.8376         |
| Occurrence 088           | 19.7171         | -99.2230         |
| Occurrence 089           | 19.7412         | -98.4880         |
| Occurrence 090           | 19.7436         | -99.1814         |
| Occurrence 091           | 19.7610         | -98.5007         |
| Occurrence 092           | 19.7759         | -98.7123         |
| Occurrence 093           | 19.7761         | -99.2092         |
| Occurrence 094           | 19.7775         | -98.5454         |
| Occurrence 095           | 19.7839         | -99.8150         |
| Occurrence 096           | 19.7863         | -98.5523         |
| Occurrence 097           | 19.7944         | -99.8673         |
| Occurrence 098           | 19.8096         | -100.8912        |
| Occurrence 099           | 19.8266         | -98.7062         |
| Occurrence 100           | 19.8329         | -98.6112         |
| Occurrence 101           | 19.8331         | -99.2654         |
| Occurrence 102           | 19.8344         | -98.9835         |
| Occurrence 103           | 19.8478         | -98.6691         |
| Occurrence 104           | 19.8532         | -98.7459         |
| Occurrence 105           | 19.8655         | -100.1051        |
| Occurrence 106           | 19.8760         | -100.1771        |

**Dataset 3** (continued).

| <b>Occurrence record</b> | <b>Latitude</b> | <b>Longitude</b> |
|--------------------------|-----------------|------------------|
| Occurrence 107           | 19.8817         | -100.9460        |
| Occurrence 108           | 19.8892         | -98.6553         |
| Occurrence 109           | 19.8924         | -99.3465         |
| Occurrence 110           | 19.9001         | -99.3417         |
| Occurrence 111           | 19.9035         | -101.1360        |
| Occurrence 112           | 19.9063         | -100.5691        |
| Occurrence 113           | 19.9083         | -98.8022         |
| Occurrence 114           | 19.9424         | -99.3892         |
| Occurrence 115           | 19.9545         | -99.8436         |
| Occurrence 116           | 19.9684         | -98.5186         |
| Occurrence 117           | 19.9692         | -101.1397        |
| Occurrence 118           | 19.9803         | -98.7020         |
| Occurrence 119           | 19.9864         | -99.3199         |
| Occurrence 120           | 19.9882         | -102.2854        |
| Occurrence 121           | 19.9889         | -98.7084         |
| Occurrence 122           | 20.0059         | -99.2297         |
| Occurrence 123           | 20.0338         | -100.7212        |
| Occurrence 124           | 20.0573         | -98.4935         |
| Occurrence 125           | 20.0584         | -99.2206         |
| Occurrence 126           | 20.0821         | -101.1371        |
| Occurrence 127           | 20.0835         | -98.3676         |
| Occurrence 128           | 20.0905         | -101.1580        |
| Occurrence 129           | 20.1096         | -98.3323         |
| Occurrence 130           | 20.1297         | -99.2289         |
| Occurrence 131           | 20.1355         | -98.8856         |
| Occurrence 132           | 20.1412         | -101.1809        |
| Occurrence 133           | 20.1488         | -99.7432         |
| Occurrence 134           | 20.1495         | -98.2858         |
| Occurrence 135           | 20.1694         | -98.6488         |
| Occurrence 136           | 20.1790         | -99.7630         |
| Occurrence 137           | 20.1891         | -99.7728         |
| Occurrence 138           | 20.2069         | -98.8932         |
| Occurrence 139           | 20.2122         | -101.1330        |
| Occurrence 140           | 20.2230         | -99.8157         |
| Occurrence 141           | 20.2684         | -98.9279         |
| Occurrence 142           | 20.2775         | -99.9308         |
| Occurrence 143           | 20.2849         | -99.4124         |
| Occurrence 144           | 20.2950         | -103.1899        |
| Occurrence 145           | 20.2963         | -98.9835         |
| Occurrence 146           | 20.3042         | -99.9343         |
| Occurrence 147           | 20.3100         | -101.1788        |
| Occurrence 148           | 20.3290         | -99.9366         |
| Occurrence 149           | 20.3882         | -99.0701         |
| Occurrence 150           | 20.3943         | -101.1926        |



**Dataset 3** (continued).

| <b>Occurrence record</b> | <b>Latitude</b> | <b>Longitude</b> |
|--------------------------|-----------------|------------------|
| Occurrence 151           | 20.3950         | -98.0898         |
| Occurrence 152           | 20.4026         | -100.0279        |
| Occurrence 153           | 20.4095         | -99.3484         |
| Occurrence 154           | 20.4143         | -101.4339        |
| Occurrence 155           | 20.4375         | -99.5319         |
| Occurrence 156           | 20.4423         | -99.1722         |
| Occurrence 157           | 20.4512         | -101.5267        |
| Occurrence 158           | 20.4577         | -100.0923        |
| Occurrence 159           | 20.4663         | -98.6726         |
| Occurrence 160           | 20.4689         | -101.1314        |
| Occurrence 161           | 20.4723         | -103.4475        |
| Occurrence 162           | 20.4723         | -100.1051        |
| Occurrence 163           | 20.4749         | -99.2119         |
| Occurrence 164           | 20.4846         | -98.3143         |
| Occurrence 165           | 20.4979         | -99.9293         |
| Occurrence 166           | 20.5121         | -100.0856        |
| Occurrence 167           | 20.5223         | -100.8122        |
| Occurrence 168           | 20.5329         | -99.6329         |
| Occurrence 169           | 20.5339         | -101.1253        |
| Occurrence 170           | 20.5512         | -100.5837        |
| Occurrence 171           | 20.5697         | -100.8889        |
| Occurrence 172           | 20.5924         | -101.1262        |
| Occurrence 173           | 20.5955         | -100.2505        |
| Occurrence 174           | 20.6314         | -100.4285        |
| Occurrence 175           | 20.6460         | -98.6540         |
| Occurrence 176           | 20.6540         | -100.7661        |
| Occurrence 177           | 20.6668         | -103.3918        |
| Occurrence 178           | 20.6721         | -99.8947         |
| Occurrence 179           | 20.6741         | -103.3445        |
| Occurrence 180           | 20.6791         | -101.3546        |
| Occurrence 181           | 20.6791         | -100.7647        |
| Occurrence 182           | 20.6870         | -99.7345         |
| Occurrence 183           | 20.7006         | -100.7715        |
| Occurrence 184           | 20.7035         | -99.7205         |
| Occurrence 185           | 20.7064         | -100.3456        |
| Occurrence 186           | 20.7252         | -101.3737        |
| Occurrence 187           | 20.7324         | -99.9460         |
| Occurrence 188           | 20.7504         | -100.7703        |
| Occurrence 189           | 20.7527         | -99.7183         |
| Occurrence 190           | 20.7762         | -100.4099        |
| Occurrence 191           | 20.7835         | -99.7211         |
| Occurrence 192           | 20.8000         | -101.3335        |
| Occurrence 193           | 20.8022         | -100.4104        |
| Occurrence 194           | 20.8162         | -101.3138        |

**Dataset 3** (continued).

| <b>Occurrence record</b> | <b>Latitude</b> | <b>Longitude</b> |
|--------------------------|-----------------|------------------|
| Occurrence 195           | 20.8231         | -100.4076        |
| Occurrence 196           | 20.8316         | -99.7197         |
| Occurrence 197           | 20.8511         | -100.7788        |
| Occurrence 198           | 20.8545         | -101.3074        |
| Occurrence 199           | 20.8829         | -99.7066         |
| Occurrence 200           | 20.8855         | -100.4165        |
| Occurrence 201           | 20.9192         | -100.7448        |
| Occurrence 202           | 20.9367         | -100.4173        |
| Occurrence 203           | 20.9971         | -100.3873        |
| Occurrence 204           | 21.0054         | -100.4377        |
| Occurrence 205           | 21.0214         | -101.8537        |
| Occurrence 206           | 21.0257         | -99.7444         |
| Occurrence 207           | 21.0302         | -102.4044        |
| Occurrence 208           | 21.0416         | -99.8655         |
| Occurrence 209           | 21.0492         | -100.7974        |
| Occurrence 210           | 21.0494         | -99.7775         |
| Occurrence 211           | 21.0540         | -101.5814        |
| Occurrence 212           | 21.0586         | -99.8025         |
| Occurrence 213           | 21.0675         | -100.8029        |
| Occurrence 214           | 21.0884         | -101.3944        |
| Occurrence 215           | 21.1009         | -99.7113         |
| Occurrence 216           | 21.1247         | -100.8346        |
| Occurrence 217           | 21.1250         | -101.3842        |
| Occurrence 218           | 21.1254         | -100.5713        |
| Occurrence 219           | 21.1299         | -102.0019        |
| Occurrence 220           | 21.1436         | -100.3190        |
| Occurrence 221           | 21.1521         | -101.3770        |
| Occurrence 222           | 21.1774         | -100.9434        |
| Occurrence 223           | 21.1797         | -101.9089        |
| Occurrence 224           | 21.2324         | -101.0272        |
| Occurrence 225           | 21.2894         | -102.2542        |
| Occurrence 226           | 21.3060         | -100.5961        |
| Occurrence 227           | 21.3328         | -101.1239        |
| Occurrence 228           | 21.3784         | -100.6797        |
| Occurrence 229           | 21.4285         | -101.1843        |
| Occurrence 230           | 21.4488         | -101.8050        |
| Occurrence 231           | 21.4672         | -100.7172        |
| Occurrence 232           | 21.4673         | -103.0887        |
| Occurrence 233           | 21.4751         | -101.7878        |
| Occurrence 234           | 21.4818         | -100.7224        |
| Occurrence 235           | 21.5017         | -101.7514        |
| Occurrence 236           | 21.5258         | -102.2404        |
| Occurrence 237           | 21.5778         | -101.0984        |
| Occurrence 238           | 21.5909         | -101.0891        |
| Occurrence 239           | 21.6066         | -100.7616        |

**Dataset 3** (continued).

| <b>Occurrence record</b> | <b>Latitude</b> | <b>Longitude</b> |
|--------------------------|-----------------|------------------|
| Occurrence 240           | 21.6125         | -101.0780        |
| Occurrence 241           | 21.6273         | -103.0660        |
| Occurrence 242           | 21.6329         | -102.9843        |
| Occurrence 243           | 21.6643         | -100.7132        |
| Occurrence 244           | 21.6974         | -101.6143        |
| Occurrence 245           | 21.7070         | -102.8692        |
| Occurrence 246           | 21.7137         | -100.9797        |
| Occurrence 247           | 21.7473         | -101.6076        |
| Occurrence 248           | 21.7596         | -101.8473        |
| Occurrence 249           | 21.7670         | -100.6986        |
| Occurrence 250           | 21.7749         | -102.8038        |
| Occurrence 251           | 21.7975         | -103.2989        |
| Occurrence 252           | 21.8170         | -100.7303        |
| Occurrence 253           | 21.8207         | -102.7693        |
| Occurrence 254           | 21.8318         | -100.7305        |
| Occurrence 255           | 21.8485         | -100.7447        |
| Occurrence 256           | 21.8654         | -101.5936        |
| Occurrence 257           | 21.8717         | -102.7030        |
| Occurrence 258           | 21.8736         | -100.8960        |
| Occurrence 259           | 21.8759         | -100.7702        |
| Occurrence 260           | 21.8817         | -102.2909        |
| Occurrence 261           | 21.8900         | -101.6501        |
| Occurrence 262           | 21.8914         | -102.2158        |
| Occurrence 263           | 21.9024         | -101.1897        |
| Occurrence 264           | 21.9035         | -100.8711        |
| Occurrence 265           | 21.9101         | -101.8622        |
| Occurrence 266           | 21.9204         | -102.2049        |
| Occurrence 267           | 21.9226         | -99.9815         |
| Occurrence 268           | 21.9272         | -101.8576        |
| Occurrence 269           | 21.9382         | -100.5831        |
| Occurrence 270           | 21.9467         | -101.8592        |
| Occurrence 271           | 21.9504         | -102.1529        |
| Occurrence 272           | 21.9647         | -101.9522        |
| Occurrence 273           | 21.9764         | -100.8062        |
| Occurrence 274           | 21.9781         | -102.6772        |
| Occurrence 275           | 22.0115         | -101.2428        |
| Occurrence 276           | 22.0388         | -100.7330        |
| Occurrence 277           | 22.0431         | -102.1116        |
| Occurrence 278           | 22.0578         | -101.1817        |
| Occurrence 279           | 22.0970         | -100.7087        |
| Occurrence 280           | 22.1006         | -101.0914        |
| Occurrence 281           | 22.1166         | -102.0648        |
| Occurrence 282           | 22.1568         | -100.9862        |
| Occurrence 283           | 22.1581         | -102.4793        |
| Occurrence 284           | 22.2232         | -102.0014        |

**Dataset 3** (continued).

| <b>Occurrence record</b> | <b>Latitude</b> | <b>Longitude</b> |
|--------------------------|-----------------|------------------|
| Occurrence 285           | 22.2657         | -101.1126        |
| Occurrence 286           | 22.2821         | -101.9887        |
| Occurrence 287           | 22.3138         | -102.2363        |
| Occurrence 288           | 22.3289         | -101.1972        |
| Occurrence 289           | 22.3481         | -102.0691        |
| Occurrence 290           | 22.3701         | -103.2040        |
| Occurrence 291           | 22.3869         | -100.7784        |
| Occurrence 292           | 22.4052         | -99.6005         |
| Occurrence 293           | 22.4179         | -103.1712        |
| Occurrence 294           | 22.4419         | -101.9104        |
| Occurrence 295           | 22.4483         | -100.6794        |
| Occurrence 296           | 22.4687         | -99.7074         |
| Occurrence 297           | 22.4996         | -100.5000        |
| Occurrence 298           | 22.5604         | -100.6465        |
| Occurrence 299           | 22.5922         | -103.0251        |
| Occurrence 300           | 22.6208         | -102.8000        |
| Occurrence 301           | 22.6313         | -100.5241        |
| Occurrence 302           | 22.6661         | -99.9074         |
| Occurrence 303           | 22.6844         | -100.5058        |
| Occurrence 304           | 22.6939         | -103.0304        |
| Occurrence 305           | 22.7336         | -102.6780        |
| Occurrence 306           | 22.7678         | -102.4644        |
| Occurrence 307           | 22.7889         | -103.1313        |
| Occurrence 308           | 22.8136         | -100.4869        |
| Occurrence 309           | 22.8455         | -99.8554         |
| Occurrence 310           | 22.8922         | -109.9179        |
| Occurrence 311           | 22.9160         | -100.4692        |
| Occurrence 312           | 22.9963         | -99.7300         |
| Occurrence 313           | 23.0298         | -102.7611        |
| Occurrence 314           | 23.0459         | -100.4910        |
| Occurrence 315           | 23.0612         | -109.7061        |
| Occurrence 316           | 23.1729         | -102.8627        |
| Occurrence 317           | 23.2372         | -99.6770         |
| Occurrence 318           | 23.2874         | -100.5588        |
| Occurrence 319           | 23.5227         | -103.0656        |
| Occurrence 320           | 23.5818         | -103.2521        |
| Occurrence 321           | 23.6217         | -101.7567        |
| Occurrence 322           | 23.6264         | -103.9213        |
| Occurrence 323           | 23.6903         | -100.8861        |
| Occurrence 324           | 23.7361         | -99.1418         |
| Occurrence 325           | 23.8483         | -104.2442        |
| Occurrence 326           | 23.9016         | -100.4744        |
| Occurrence 327           | 24.0123         | -100.4126        |
| Occurrence 328           | 24.0274         | -104.6530        |
| Occurrence 329           | 24.0923         | -100.3818        |

**Dataset 3** (continued).

| <b>Occurrence record</b> | <b>Latitude</b> | <b>Longitude</b> |
|--------------------------|-----------------|------------------|
| Occurrence 330           | 24.1445         | -110.3105        |
| Occurrence 331           | 24.4408         | -100.3476        |
| Occurrence 332           | 24.5288         | -104.7745        |
| Occurrence 333           | 24.5779         | -100.2678        |
| Occurrence 334           | 24.6144         | -101.4191        |
| Occurrence 335           | 24.6738         | -100.2990        |
| Occurrence 336           | 24.8075         | -104.9163        |
| Occurrence 337           | 24.8194         | -100.0698        |
| Occurrence 338           | 24.8668         | -103.6967        |
| Occurrence 339           | 25.0269         | -100.5509        |
| Occurrence 340           | 25.3641         | -100.7992        |
| Occurrence 341           | 25.4421         | -102.1756        |
| Occurrence 342           | 25.5582         | -103.4722        |
| Occurrence 343           | 25.6738         | -100.3090        |
| Occurrence 344           | 26.0703         | -98.2911         |
| Occurrence 345           | 26.5912         | -109.3417        |
| Occurrence 346           | 28.6237         | -109.9545        |
| Occurrence 347           | 28.6339         | -106.0741        |
| Occurrence 348           | 29.0920         | -110.9502        |
| Occurrence 349           | 30.3282         | -109.6297        |
| Occurrence 350           | 30.4000         | -110.1000        |
| Occurrence 351           | 30.4444         | -109.7280        |
| Occurrence 352           | 31.3007         | -110.9400        |
| Occurrence 353           | 31.3139         | -109.1900        |
| Occurrence 354           | 31.7371         | -106.4747        |
| Occurrence 355           | 31.8563         | -116.6098        |
| Occurrence 356           | 32.5678         | -116.6283        |
| Occurrence 357           | 32.6263         | -115.4530        |
